# Supplementary material
Source: PubMed Central journal article supplement (PMC4040545)
Supplement: 1308674111_pnas.201308674SI.pdf [file 1308674111_pnas.201308674SI.pdf]

# Supporting Information

Michael et al. 10.1073/pnas.1308674111

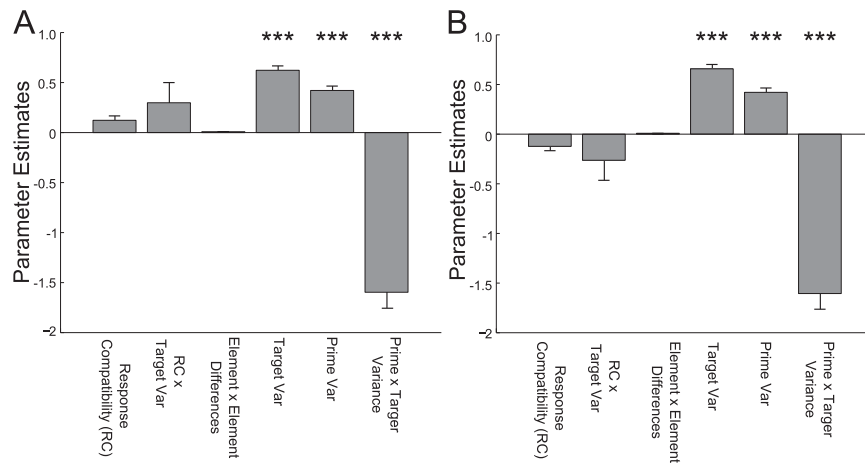

**Fig. S1.** Parameter estimates from a regression of prime and target statistics on response times, with additional response compatibility regressors included. Data from Exp. 1. All error bars show SEM. (A) Parameter estimates for (i) response compatibility measure (RC), defined as the absolute difference between the sum of feature values for prime and target arrays ( $|\Sigma_{1-8} - T_{1-8}|$ ), and (ii) its interaction with target variance, alongside (iii) the summed element by element difference (as shown individually in Fig. 2B), (iv) target variance, (v) prime variance, and (vi) the interaction between prime and target variance. (B) As for A, with RC defined instead as the sum of the prime and target feature values ( $\Sigma_{1-8} + T_{1-8}$ ).

**Table S1. Effect of prime and target statistics**

| Variable             | DOF   | F value | P value   |
|----------------------|-------|---------|-----------|
| Exp. 1               |       |         |           |
| Tvar                 | 1, 39 | 76.9    | <0.001*** |
| Pvar                 | 1, 39 | 5.24    | 0.028*    |
| Tvar $\times$ Pvar   | 1, 39 | 27.5    | <0.001*** |
| Exp. 2, variance     |       |         |           |
| Tvar                 | 1, 38 | 37.8    | <0.001*** |
| Pvar                 | 1, 38 | 1.27    | 0.267     |
| Tvar $\times$ Pvar   | 1, 38 | 5.03    | 0.031*    |
| Exp. 2, mean         |       |         |           |
| Tmean                | 1, 38 | 63.6    | <0.001*** |
| Pmean                | 1, 38 | 0.04    | 0.841     |
| Tmean $\times$ Pmean | 1, 38 | 0.20    | 0.661     |

Exp. 1. ANOVA with two factors [prime variance (Pvar) or target variance (Tvar)], each with two levels (high/low). \* $P < 0.05$ , \*\* $P < 0.01$ , or \*\*\* $P < 0.001$ . Exp. 2. ANOVA with two factors (prime/target variance or prime/target mean distance from category boundary), each with two levels (high/low). DOF, degrees of freedom.

**Table S2. Effect of prime–target intervals (PTI)**

| Variable          | DOF    | F value | P value   |
|-------------------|--------|---------|-----------|
| Tvar              | 1, 78  | 105     | <0.001*** |
| Pvar              | 1, 78  | 6.37    | 0.014*    |
| Pvar × Tvar       | 1, 78  | 26.2    | <0.001*** |
| PTI               | 2, 121 | 16.7    | <0.001*** |
| PTI × Tvar        | 2, 153 | 1.31    | 0.273     |
| PTI × Pvar        | 2, 155 | 0.80    | 0.450     |
| PTI × Pvar × Tvar | 2, 147 | 1.97    | 0.146     |

Exps. 1 and 2. ANOVA with three factors: prime/target variance and PTI duration. Prime and target variance had two levels (high/low) and PTI had three levels (100, 200, or 500 ms). \* $P < 0.05$ , \*\* $P < 0.01$ , or \*\*\* $P < 0.001$ .

**Table S3. Effect of category congruence on reaction times (RTs): Data collapsed across all PTI conditions (Exp. 3 omitted, because it is identical to Table S5)**

| Variable             | DOF   | F value | P value   |
|----------------------|-------|---------|-----------|
| Exp. 1               |       |         |           |
| Tvar                 | 1, 39 | 78.3    | <0.001*** |
| Switch               | 1, 39 | 23.0    | <0.001*** |
| Tvar × Switch        | 1, 39 | 0.48    | 0.492     |
| Pvar                 | 1, 39 | 4.82    | 0.034*    |
| Pvar × Switch        | 1, 39 | 16.5    | <0.001*** |
| Pvar × Tvar          | 1, 39 | 27.1    | <0.001*** |
| Pvar × Tvar × Switch | 1, 39 | 9.42    | 0.004**   |
| Exp. 2               |       |         |           |
| Tvar                 | 1, 38 | 38.3    | <0.001*** |
| Switch               | 1, 38 | 20.9    | <0.001*** |
| Tvar × Switch        | 1, 38 | 0.02    | 0.893     |
| Pvar                 | 1, 38 | 0.99    | 0.326     |
| Pvar × Switch        | 1, 38 | 6.81    | 0.013*    |
| Pvar × Tvar          | 1, 38 | 5.03    | 0.031*    |
| Pvar × Tvar × Switch | 1, 38 | 11.2    | 0.002**   |

Exp. 1. ANOVA with three factors (prime/target variance and category congruence: switch), each with two levels (high/low or switch/stay). Exp. 2. ANOVA with three factors (prime/target variance and category congruence: switch), each with two levels (high/low or switch/stay). \* $P < 0.05$ , \*\* $P < 0.01$ , or \*\*\* $P < 0.001$ .

**Table S4. Regression analyses for prime × target variance interaction, for switch and stay trials**

|         | Switch                        | Stay                            |
|---------|-------------------------------|---------------------------------|
| Overall | $t_{(92)} = 1.38, P < 0.09$   | $t_{(92)} = 7.66, P < 0.001***$ |
| Exp. 1  | $t_{(39)} = 1.44, P < 0.08$   | $t_{(39)} = 6.15, P < 0.001***$ |
| Exp. 2  | $t_{(38)} = 1.22, P < 0.884$  | $t_{(38)} = 3.54, P < 0.001***$ |
| Exp. 3  | $t_{(13)} = 2.24, P < 0.021*$ | $t_{(13)} = 3.91, P < 0.001***$ |

Data collapsed across all PTI conditions. \* $P < 0.05$ , \*\* $P < 0.01$ , or \*\*\* $P < 0.001$ .

**Table S5. Effect of category congruence on RTs: 100- and 200-ms PTI conditions**

| Variable             | DOF   | F value | P value   |
|----------------------|-------|---------|-----------|
| <b>Exp. 1</b>        |       |         |           |
| Tvar                 | 1, 39 | 67.1    | <0.001*** |
| Switch               | 1, 39 | 32.3    | <0.001*** |
| Tvar*Switch          | 1, 39 | 1.23    | 0.275     |
| Pvar                 | 1, 39 | 2.63    | 0.113     |
| Pvar × Switch        | 1, 39 | 13.6    | <0.001*** |
| Pvar × Tvar          | 1, 39 | 30.1    | <0.001*** |
| Pvar × Tvar × Switch | 1, 39 | 5.74    | 0.022*    |
| <b>Exp. 2</b>        |       |         |           |
| Tvar                 | 1, 38 | 32.4    | <0.001*** |
| Switch               | 1, 38 | 24.6    | <0.001*** |
| Tvar × Switch        | 1, 38 | 0.01    | 0.993     |
| Pvar                 | 1, 38 | 1.07    | 0.308     |
| Pvar × Switch        | 1, 38 | 2.18    | 0.148     |
| Pvar × Tvar          | 1, 38 | 4.59    | 0.039*    |
| Pvar × Tvar × Switch | 1, 38 | 9.05    | 0.005**   |
| <b>Exp. 3</b>        |       |         |           |
| Tvar                 | 1, 13 | 18.9    | 0.001***  |
| Switch               | 1, 13 | 2.52    | 0.137     |
| Tvar × Switch        | 1, 13 | 1.98    | 0.183     |
| Pvar                 | 1, 13 | 8.64    | 0.011*    |
| Pvar × Switch        | 1, 13 | 2.52    | 0.136     |
| Pvar × Tvar          | 1, 13 | 13.7    | 0.003**   |
| Pvar × Tvar × Switch | 1, 13 | 3.90    | 0.070     |

Exp. 1. ANOVA with three factors (prime/target variance and category congruence: switch), each with two levels (high/low or switch/stay). Exp. 2. ANOVA with three factors (prime/target variance and category congruence: switch), each with two levels (high/low or switch/stay). Exp. 3. ANOVA with three factors (prime/target variance and category congruence: switch), each with two levels (high/low or switch/stay). \* $P < 0.05$ , \*\* $P < 0.01$ , or \*\*\* $P < 0.001$ .
